# Supplementary material for: Novel diphosphine-modified palladium catalysts for oxidative carbonylation of styrene to methyl cinnamate †
Source: Royal Society of Chemistry journal article supplement (doi:10.1039/b009635k), 2001-01-01
Supplement: b009635k.doc [file b009635k.doc]

**Novel Diphosphine-Modified Palladium Catalysts for the Oxidative Carbonylation of Styrene to Methyl Cinnamate**

Claudio Bianchini, Giuseppe Mantovani, Andrea Meli, Werner Oberhauser, Peter Brüggeller and Thomas Stampfl

**Supplementary Information**

**Synthesis of Pd(L-L)(CN)2**.All Pd(L-L)(CN)2complexes were synthesized by a same procedure. To 0.126 mmol of phosphine in 5 mL of DMF was added 0.126 mmol of Pd(CN)2. The resulting clear yellow solution was allowed to stir overnight. Then slow addition of 30 mL of diethyl ether gave a colourless solid which was filtered on a frit, washed with diethyl ether and dried under vacuum overnight.

| L-L | Yield (%) | 31P{1H} NMR ()a | (C-N) (cm-1)b |
| --- | --- | --- | --- |
| dppe c | 65 | 53.8 | 2139, 2134 |
| *meso*-(CH3CHPPh2)2 | 67 | 59.4 | 2142, 2134 |
| *rac* -(CH3CHPPh2)2 | 79 | 57.6 | 2138 |
| C6H4(PPh2)2 | 52 | 57.7 | 2138, 2125 |

a in DMF-d7 unless otherwise stated. b in KBr. c in CDCl3, ref: Bemi, L.; Clark, H. C.; Davies, J. A.; Fyfe, C. A.; Wasylishen, R. E. *J. Am. Chem. Soc*. **1982**, *104*, 438-445.
